# Supplementary material for: Association Between Workarounds and Medication Administration Errors in Bar Code-Assisted Medication Administration: Protocol of a Multicenter Study
Source: PubMed Central journal article supplement (PMC5429431; doi:10.2196/resprot.7060), 2017-04-28
Supplement: resprot_v6i4e74_app1.pdf [file resprot_v6i4e74_app1.pdf]

## Appendix A: Potential risk factors form

Potential risk factors

Date and time: .....-..... - 20.....

Hospital: .....

Ward: .....

Patient number and gender:

.....M/F...

Date of birth: .....

Nurse name: .....

Drug name, form and strength: .....

.....

### A nurse characteristics

- experienced nurse
- trained nurse
- student nurse
- nurse satisfaction with BCMA

### B. workload characteristics

- number of nurses on ward .....
- number of patients served by that ward .....
- number of medications per round per patient .....

- number of medication for all patients per round per ward .....

C. BCMA characteristics

- time after implementation of BCMA on that ward .....
- barcode on medication unit dose .....Y/N..

D. medication characteristics

- ATC code medication .....
- drug administration route .....

E. general characteristics

- hospital type .....
- ward type .....
- time of medication administration round .....
