# Supplementary material for: Association Between Workarounds and Medication Administration Errors in Bar Code-Assisted Medication Administration: Protocol of a Multicenter Study
Source: PubMed Central journal article supplement (PMC5429431; doi:10.2196/resprot.7060), 2017-04-28
Supplement: resprot_v6i4e74_app3.pdf [file resprot_v6i4e74_app3.pdf]

## Appendix C: Workarounds observation form

Workarounds observation form:

Date and time: .....-..... - 20..... .....

Hospital: .....

Ward: .....

Patient number and gender:

.....M/F .....

Date of birth: .....

Nurse name: .....

Drug name, form and strength: .....

.....

Medication scanned:

yes

scanning barcode unit dose package separately from medication (medication already  
peeled out from the unit dose)

no

Patient scanned:

yes, in patient room

yes, but not in patient room

no

Scanning barcode attached to patient:

- yes
- yes but not scannable
- no

Overruling computer alerts or signals:

- yes
- no
- yes but alert or signal ignored

Alerts or signals not seen

- yes
- no

Confirming medication administration before the administration is given to the patient (not real-time):

- yes
- no

Scanning medication for more than one patient simultaneously:

- yes
- no

Intake of the medication left to the patient / medication in house:

- yes
- no

Hardware / software defect or deliberately disabled

- yes
- no
